# Supplementary material for: Angiotensin II induces coordinated calcium bursts in aldosterone-producing adrenal rosettes
Source: PubMed Central journal article supplement (PMC7125102; doi:10.1038/s41467-020-15408-4), 2020-04-03
Supplement: 41467_2020_15408_MOESM3_ESM.pdf [file 41467_2020_15408_MOESM3_ESM.pdf]

### **Description of Additional Supplementary Files**

File Name: Supplementary Movie 1

Description: Ang II evokes robust calcium oscillations in zG cells expressing GCaMP3. Images were captured at 20 Hz and compiled showing basal and 3nM Ang II-evoked activity (as indicated). Video was resampled at ~5x real-time.
